# Supplementary material for: Opposite effects of aerosols and meteorological parameters on warm clouds in two contrasting regions over eastern China
Source: Copernicus journal article supplement (doi:10.5194/acp-24-4651-2024), 2024-04-18
Supplement: Supplementary file 1 [file acp-24-4651-2024-supplement.pdf]

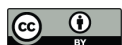

*Supplement of*

## **Opposite effects of aerosols and meteorological parameters on warm clouds in two contrasting regions over eastern China**

**Yuqin Liu et al.**

*Correspondence to:* Tao Lin (tlin@iue.ac.cn) and Gerrit de Leeuw (gerrit.de.leeuw@knmi.nl)

The copyright of individual parts of the supplement might differ from the article licence.

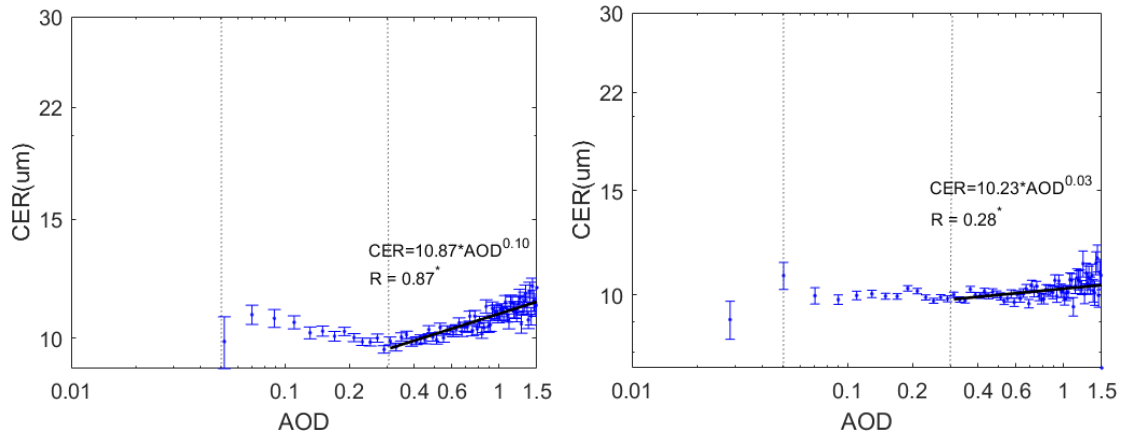

Figure S1. CER vs AOD over the YRD for the periods 2008-2014 (left) and 2015-2022 (right). Here all CER data were averaged in AOD bins, from 0.0 to 1.5 with a step of 0.02. Note that the data are plotted on a log-log scale. The lines for the YRD data for AOD>0.3 represent least-square fits to the binned data, and the resulting relations are presented in each figure. The marker \* at the top right corner of the R value indicates that the correlation is statistically significant with  $p < 0.01$ . The thin vertical lines indicate the AOD regimes as explained in the text.

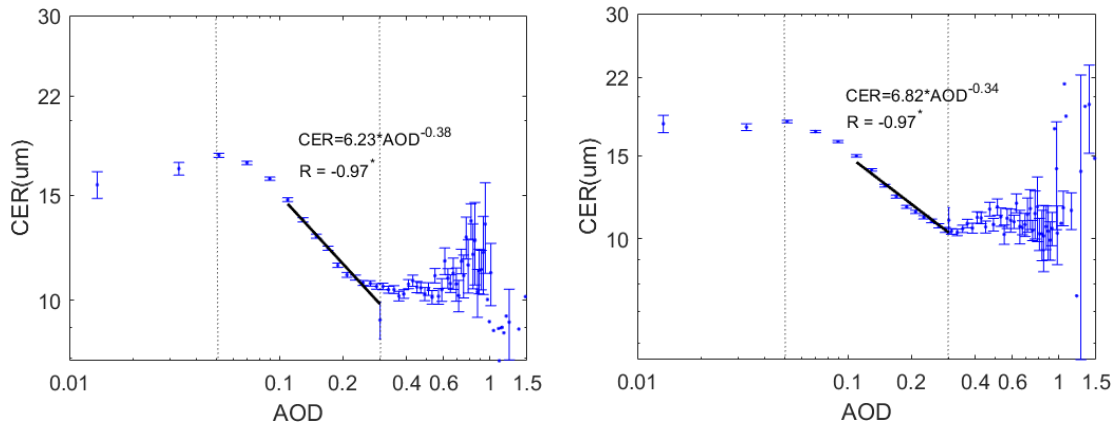

Figure S2. CER vs AOD over the ECS for the periods 2008-2014 (left) and 2015-2022 (right). Here all CER data were averaged in AOD bins, from 0.0 to 1.5 with a step of 0.02. Note that the data are plotted on a log-log scale. The lines for the ECS data for  $0.1 < \text{AOD} < 0.3$  represent least-square fits to the binned data, and the resulting relations are presented in each figure. The marker \* at the top right corner of the R value indicates that the correlation is statistically significant with  $p < 0.01$ . The thin vertical lines indicate the AOD regimes as explained in the text.
